# Supplementary material for: Efficacy of an Education Program for People With Diabetes and Insulin Pump Treatment (INPUT): Results From a Randomized Controlled Trial
Source: Oxford University Press journal article supplement (doi:10.2337/dc18-0917), 2018-10-10
Supplement: dc180917supplementarydata.pdf [file dc180917supplementarydata.pdf]

## SUPPLEMENTARY DATA

**Supplementary Table 1.** Content of the INPUT education and treatment program

| INPUT lessons                                | Content                                                                                                                                                                                                                                                                                    |
|----------------------------------------------|--------------------------------------------------------------------------------------------------------------------------------------------------------------------------------------------------------------------------------------------------------------------------------------------|
| 1: Understanding CSII-therapy                | <ul style="list-style-type: none"> <li>• Individual goal setting</li> <li>• Differences between MDI- and CSII-therapy</li> <li>• Advantages of CSII-therapy</li> <li>• Understanding basal insulin demand and basal rate</li> </ul>                                                        |
| 2: Motivation for CSII-therapy               | <ul style="list-style-type: none"> <li>• Personal value of CSII-therapy</li> <li>• What is going well – what isn't</li> <li>• Continuous glucose monitoring</li> <li>• Testing the basal rate</li> </ul>                                                                                   |
| 3: Adjusting basal rates                     | <ul style="list-style-type: none"> <li>• How to adjust the basal rate</li> <li>• Advantages of temporary basal rates</li> <li>• Examples for using temporary basal rates</li> <li>• Using different basal rates (basal rate profiles)</li> <li>• Dealing with catheter problems</li> </ul> |
| 4: Eating and drinking with the insulin pump | <ul style="list-style-type: none"> <li>• Carbohydrate content of food and meals</li> <li>• Training of carbohydrate estimation</li> <li>• Understanding insulin-to-carb ratio</li> <li>• Understanding correction factors</li> </ul>                                                       |
| 5: Determining and adjusting bolus insulin   | <ul style="list-style-type: none"> <li>• Training of carbohydrate estimation</li> <li>• Advantages of different bolus options</li> <li>• Examples for using bolus options</li> <li>• Determining the correct insulin dose – bolus calculators</li> </ul>                                   |
| 6: Management of hyperglycemia               | <ul style="list-style-type: none"> <li>• Recognizing patterns within glucose profiles</li> <li>• Reasons for hyperglycemia</li> <li>• Handling of hyperglycemic glucose values</li> <li>• Management of ketoacidosis</li> <li>• Evaluation of individual goals</li> </ul>                  |
| 7: Management of hypoglycemia                | <ul style="list-style-type: none"> <li>• Reasons for hypoglycemia</li> <li>• Handling of hypoglycemia</li> <li>• Sensor-augmented pump therapy</li> </ul>                                                                                                                                  |
| 8: Physical activity                         | <ul style="list-style-type: none"> <li>• Gaining flexibility with temporary basal rates</li> <li>• How to adjust CSII-therapy before/during/after physical activity</li> </ul>                                                                                                             |
| 9: CSII-therapy in special situations        | <ul style="list-style-type: none"> <li>• CSII-therapy in social situations</li> <li>• When it's hot, cold, dirty</li> <li>• Travelling with the insulin pump</li> <li>• Short-term discontinuation of CSII-therapy</li> <li>• Pregnancy</li> </ul>                                         |
| 10: CSII-therapy and family/partnership      | <ul style="list-style-type: none"> <li>• Finding ways of supporting each other</li> <li>• Dealing with hypoglycemia</li> </ul>                                                                                                                                                             |
| 11: Learning from mistakes                   | <ul style="list-style-type: none"> <li>• Positive error management</li> <li>• What motivates for optimal glycemic control?</li> <li>• Attitudes towards CSII-therapy</li> </ul>                                                                                                            |
| 12: Closing the loop                         | <ul style="list-style-type: none"> <li>• Evaluation of personal goals</li> <li>• What has changed since the beginning of INPUT?</li> <li>• Future developments and artificial pancreas</li> </ul>                                                                                          |

# SUPPLEMENTARY DATA

**Supplementary Table 2.** Changes in therapy parameters

| Per-protocol population (N = 254)                                                                                                                                                                                  | INPUT (n =128) |             | Control group (n = 126) |             | p*    |
|--------------------------------------------------------------------------------------------------------------------------------------------------------------------------------------------------------------------|----------------|-------------|-------------------------|-------------|-------|
|                                                                                                                                                                                                                    | Baseline       | Follow-up   | Baseline                | Follow-up   |       |
| Self-monitored blood glucose measurements (number per day)                                                                                                                                                         | 5.3 (1.8)      | 4.8 (2.3)   | 5.2 (1.9)               | 5.3 (4.3)   | 0.405 |
| Percentage of participants using rtCGM <sup>#</sup>                                                                                                                                                                | 13.1%          | 5.3%        | 10.2%                   | 5.1%        | 0.829 |
| Percentage of participants using iscCGM <sup>#</sup>                                                                                                                                                               | 17.6%          | 57.1%       | 16.9%                   | 31.7%       | 0.001 |
| Combined use of rtCGM or iscCGM <sup>#</sup>                                                                                                                                                                       | 29.4%          | 61.1%       | 25.6%                   | 36.3%       | 0.001 |
| Basal insulin dose (Insulin units per day)                                                                                                                                                                         | 24.8 (12.7)    | 24.9 (13.7) | 24.6 (10.7)             | 25.0 (10.6) | 0.658 |
| Basal insulin need (insulin units/kg)                                                                                                                                                                              | 0.29 (0.11)    | 0.30 (0.16) | 0.29 (0.09)             | 0.29 (0.09) | 0.842 |
| BMI (kg/m <sup>2</sup> )                                                                                                                                                                                           | 28.3 (5.8)     | 28.1 (5.9)  | 27.9 (5.6)              | 28.0 (5.6)  | 0.116 |
| Data are mean (SD) or %; * p-values for between-group difference of change; # rtCGM = real time continuous glucose monitoring; iscCGM = intermittent scan continuous glucose monitoring (Flash Glucose Monitoring) |                |             |                         |             |       |

**Supplementary Table 3.** Effect of the interaction between group and relevant baseline variables on the primary outcome (Moderator analysis).

|                                                                                                                                                                                                                                                                                                                                                                                                                                                                                                                                                                                                                                                                                                                                         | Standardized beta coefficient of the interaction | P <sub>interaction</sub> |
|-----------------------------------------------------------------------------------------------------------------------------------------------------------------------------------------------------------------------------------------------------------------------------------------------------------------------------------------------------------------------------------------------------------------------------------------------------------------------------------------------------------------------------------------------------------------------------------------------------------------------------------------------------------------------------------------------------------------------------------------|--------------------------------------------------|--------------------------|
| Age                                                                                                                                                                                                                                                                                                                                                                                                                                                                                                                                                                                                                                                                                                                                     | -0.237                                           | 0.108                    |
| Gender <sup>+</sup>                                                                                                                                                                                                                                                                                                                                                                                                                                                                                                                                                                                                                                                                                                                     | 0.064                                            | 0.452                    |
| HbA1c                                                                                                                                                                                                                                                                                                                                                                                                                                                                                                                                                                                                                                                                                                                                   | -0.016                                           | 0.802                    |
| Use of continuous glucose monitoring technology <sup>+#</sup>                                                                                                                                                                                                                                                                                                                                                                                                                                                                                                                                                                                                                                                                           | -0.02                                            | 0.783                    |
| Duration of CSII-therapy                                                                                                                                                                                                                                                                                                                                                                                                                                                                                                                                                                                                                                                                                                                | 0.103                                            | 0.260                    |
| Age of onset of CSII-therapy                                                                                                                                                                                                                                                                                                                                                                                                                                                                                                                                                                                                                                                                                                            | -0.240                                           | 0.042                    |
| Number of previous education courses                                                                                                                                                                                                                                                                                                                                                                                                                                                                                                                                                                                                                                                                                                    | -0.041                                           | 0.661                    |
| Years since last diabetes education                                                                                                                                                                                                                                                                                                                                                                                                                                                                                                                                                                                                                                                                                                     | 0.111                                            | 0.200                    |
| Therapy regimen at last structured education <sup>+</sup>                                                                                                                                                                                                                                                                                                                                                                                                                                                                                                                                                                                                                                                                               | -0.019                                           | 0.846                    |
| Diabetes distress                                                                                                                                                                                                                                                                                                                                                                                                                                                                                                                                                                                                                                                                                                                       | 0.098                                            | 0.328                    |
| Depressive symptoms                                                                                                                                                                                                                                                                                                                                                                                                                                                                                                                                                                                                                                                                                                                     | 0.081                                            | 0.439                    |
| Empowerment                                                                                                                                                                                                                                                                                                                                                                                                                                                                                                                                                                                                                                                                                                                             | -0.319                                           | 0.170                    |
| Treatment satisfaction                                                                                                                                                                                                                                                                                                                                                                                                                                                                                                                                                                                                                                                                                                                  | -0.062                                           | 0.751                    |
| Recruited pool size                                                                                                                                                                                                                                                                                                                                                                                                                                                                                                                                                                                                                                                                                                                     | -0.503                                           | 0.001                    |
| Study center*                                                                                                                                                                                                                                                                                                                                                                                                                                                                                                                                                                                                                                                                                                                           | 1.434*                                           | 0.088                    |
| Separate linear regression analyses were performed for each baseline variable with HbA1c at follow-up as dependent variable, group, baseline variable and baseline HbA1c as main effects and the respective interaction term between group and baseline variable; + categorical variables (dummy coding): 0 = male, 1 = female; 0 = no use, 1 = use; 0 = MDI at last education, 1 = CSII at last education; # rtCGM or iscCGM (rtCGM = real time continuous glucose monitoring; iscCGM = intermittent scan continuous glucose monitoring [Flash Glucose Monitoring]); * Analysis of covariance with baseline HbA1c as covariate was performed and the respective F value of the interaction between study center and group is reported. |                                                  |                          |

# SUPPLEMENTARY DATA

**Supplementary Table 4.** Mediation effect of relevant variables on the change in HbA1c

|                                                                                                                                                                                                                                                                                                                                                                                                                                                                                                                               | Standardized<br>beta coefficient | p <sub>beta-coefficient</sub> | Sobel-Test statistic for<br>mediation effect | p <sub>soebel</sub> |
|-------------------------------------------------------------------------------------------------------------------------------------------------------------------------------------------------------------------------------------------------------------------------------------------------------------------------------------------------------------------------------------------------------------------------------------------------------------------------------------------------------------------------------|----------------------------------|-------------------------------|----------------------------------------------|---------------------|
| Group                                                                                                                                                                                                                                                                                                                                                                                                                                                                                                                         | 0.185                            | 0.004                         | 0.697                                        | 0.46                |
| Reduction in diabetes distress                                                                                                                                                                                                                                                                                                                                                                                                                                                                                                | 0.045                            | 0.480                         |                                              |                     |
|                                                                                                                                                                                                                                                                                                                                                                                                                                                                                                                               |                                  |                               |                                              |                     |
| Group                                                                                                                                                                                                                                                                                                                                                                                                                                                                                                                         | 0.150                            | 0.017                         | 1.848                                        | 0.063               |
| Reduction in depressive<br>symptoms                                                                                                                                                                                                                                                                                                                                                                                                                                                                                           | 0.162                            | 0.010                         |                                              |                     |
|                                                                                                                                                                                                                                                                                                                                                                                                                                                                                                                               |                                  |                               |                                              |                     |
| Group                                                                                                                                                                                                                                                                                                                                                                                                                                                                                                                         | 0.123                            | 0.050                         | 2.609                                        | 0.009               |
| Improvement in diabetes self-<br>management                                                                                                                                                                                                                                                                                                                                                                                                                                                                                   | 0.234                            | < 0.001                       |                                              |                     |
|                                                                                                                                                                                                                                                                                                                                                                                                                                                                                                                               |                                  |                               |                                              |                     |
| Group                                                                                                                                                                                                                                                                                                                                                                                                                                                                                                                         | 0.168                            | 0.008                         | 0.923                                        | 0.356               |
| Increased use of temporary basal<br>rates                                                                                                                                                                                                                                                                                                                                                                                                                                                                                     | 0.063                            | 0.320                         |                                              |                     |
|                                                                                                                                                                                                                                                                                                                                                                                                                                                                                                                               |                                  |                               |                                              |                     |
| Group                                                                                                                                                                                                                                                                                                                                                                                                                                                                                                                         | 0.188                            | 0.004                         | -1.146                                       | 0.252               |
| Increased use of bolus options                                                                                                                                                                                                                                                                                                                                                                                                                                                                                                | -0.081                           | 0.209                         |                                              |                     |
|                                                                                                                                                                                                                                                                                                                                                                                                                                                                                                                               |                                  |                               |                                              |                     |
| Group                                                                                                                                                                                                                                                                                                                                                                                                                                                                                                                         | 0.141                            | 0.031                         | 2.063                                        | 0.039               |
| New use of continuous glucose<br>monitoring technology at follow-<br>up <sup>#+</sup>                                                                                                                                                                                                                                                                                                                                                                                                                                         | 0.183                            | 0.005                         |                                              |                     |
| Separate linear regression analyses with difference in HbA1c as dependent variable and group and the respective change value as independent variables were performed. Mediation effect of the variables were tested according to Sobel. Positive values of change in HbA1c indicate improvement; # rtCGM or iscCGM (rtCGM = real time continuous glucose monitoring; iscCGM = intermittent scan continuous glucose monitoring [Flash Glucose Monitoring]); + categorical variable (dummy coding): 0 = no new use, 1 = new use |                                  |                               |                                              |                     |

# SUPPLEMENTARY DATA

**Supplementary Table 5.** Measures of fidelity and intervention implementation

| <b>Fidelity questionnaire completed by the INPUT group participants after the last course</b>       |       |               |        |
|-----------------------------------------------------------------------------------------------------|-------|---------------|--------|
| <i>Percentage of participants “partly” or “totally agreeing”</i>                                    | INPUT | Control group | p      |
| The content was important for my everyday life with the insulin pump                                | 90.4% | -             | -      |
| There was enough time to discuss problems with insulin pump therapy                                 | 89.5% | -             | -      |
| There were enough opportunities for practicing the use of insulin pump features                     | 72.0% | -             | -      |
| There was enough time to discuss and exchange experiences with other participants                   | 93.9% | -             | -      |
| There was enough time to review and intensify specific content                                      | 75.2% | -             | -      |
| I achieved my individual goals                                                                      | 87.1% | -             | -      |
| <b>Testing of basic parameters of CSII-therapy at the end of the intervention phase</b>             |       |               |        |
| Basal rate test                                                                                     | 95.3% | 19.2%         | < .001 |
| Insulin-to-carb ratio test                                                                          | 73.2% | 16%           | < .001 |
| Correction factor test                                                                              | 62.6% | 9.9%          | < .001 |
| <b>Testing of basic parameters of CSII-therapy during the 6-months after the intervention phase</b> |       |               |        |
| Basal rate test                                                                                     | 45.3% | 28.6%         | 0.006  |
| Insulin-to-carb ratio test                                                                          | 35.4% | 22.4%         | 0.026  |
| Correction factor test                                                                              | 26.8% | 12.7%         | 0.007  |

## SUPPLEMENTARY DATA

### Appendix: Study centers

Diabeteszentrum am Sophia-Charlotte-Platz: Dr. Kristina Pralle (Berlin, Germany)  
Diabetes- und Stoffwechselpraxis Bochum: Stephan Bonnermann (Bochum, Germany)  
Die Zuckerpraxis: Dr. Ewald Jammers (Bramsche, Germany)  
Diabetologische Schwerpunktpraxis Dr. Gölz: Dr. Stefan Gölz (Esslingen, Germany)  
Praxis Dres. Sammler/Denger: Dr. Armin Sammler (Friedrichsthal, Germany)  
Zentrum für Diabetologie Bergedorf: Dr. Jens Kröger (Hamburg, Germany)  
Diabetologische Schwerpunktpraxis Dr. Milek: Dr. Karsten Milek (Hohenmölsen, Germany)  
Gemeinschaftspraxis Dres. Puth/König/Brockmann: Dr. Kerstin König (Kamen, Germany)  
Hormonzentrum Karlsruhe: Sebastian Zink (Karlsruhe, Germany)  
Diabetologische Schwerpunktpraxis Dres. Cloß/Brahimi: Dr. Beqir Brahimi (Kempfen, Germany)  
Gemeinschaftspraxis Dres. Schlotmann/Hochlehnert/Zavaleta/Birgel: Dr. Michael Birgel (Köln, Germany)  
Praxis Dres. Reichert/Hinck: Dr. Dorothea Reichert (Landau, Germany)  
Diabetologische Schwerpunktpraxis Dr. Lang: Dr. Vera Lang (Lauf, Germany)  
Praxis Dr. Gläß: Dr. Florian Gläß (Magdeburg, Germany)  
Diabeteszentrum Neckar-Odenwald: Dr. Carsten Iannello (Mosbach, Germany)  
Schwerpunktpraxis für Diabetes und Ernährungsmedizin Dr. Keuthage: Dr. Winfried Keuthage (Münster, Germany)  
Zentrum für Diabetes und Gefäßerkrankungen Münster: Dr. Ludger Rose (Münster, Germany)  
Praxis Marck-Linn-Pickel: Dr. Cornelia Marck (Pohlheim, Germany)  
Praxis Dr. Lange: Dr. Martina Lange (Rheinbach, Germany)  
Diabetologische Schwerpunktpraxis Dr. Dietlein: Dr. Michael Dietlein (Stadtbergen, Germany)  
Diabetologische Schwerpunktpraxis Dr. Schreiber: Dr. Anne Schreiber (Stuttgart, Germany)  
Praxis Dres. Etzrodt/Alexopoulos: Dr. Gwendolin Etzrodt-Walter (Ulm, Germany)  
Gemeinschaftspraxis Dr. Schreiber/Werkmeister: Petra Werkmeister (Volkertshausen, Germany)  
Praxis Dr. Stürmer: Dr. Annette Klüpfel (Würzburg, Germany)  
diabendo Praxisgemeinschaft: Dr. Stephan Arndt (Rostock, Germany)  
Diabetologische Schwerpunktpraxis Galatea-Anlage: Dr. Dorothea Herber (Wiesbaden, Germany)
